# Supplementary material for: The Association of Environmental Variables with Intelligence and Well-Being in Copy Number Variation (CNV) Carriers
Source: Research Square preprint supplement (doi:10.21203/rs.3.rs-8611446/v1), 2026-02-10
Supplement: Supplementary file 1 [file 20d2026f7c6e82cf9c93935e.docx]

***
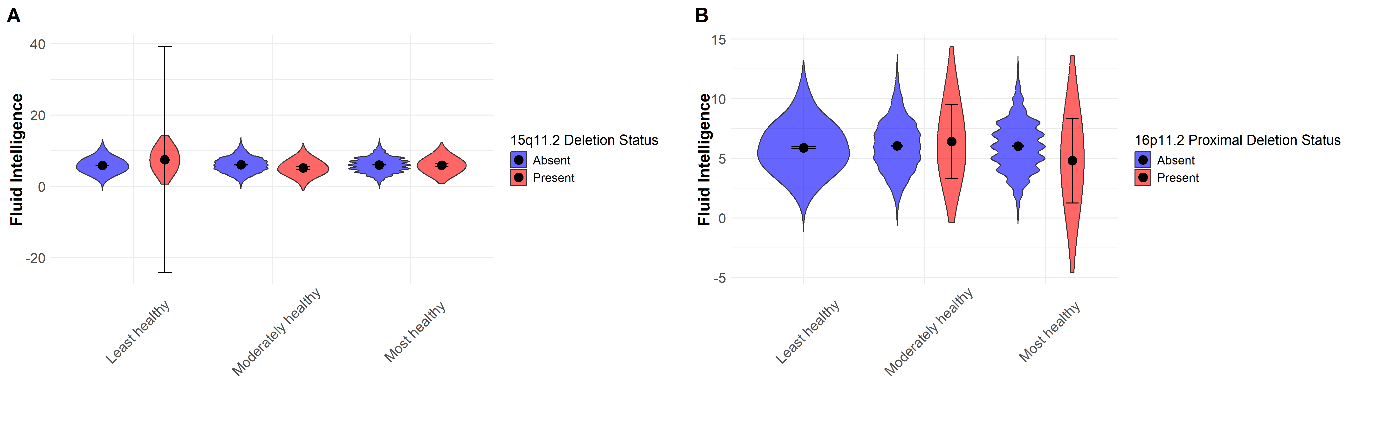
Supplementary Figure 1. Interaction plot for the effect of the 15q11.2 deletion (A) and 16p11.2 proximal deletion (B) and lifestyle on fluid intelligence (FI).*** *The x-axis represents the lifestyle, while the y-axis shows the mean FI. Violin plots show the data distribution for each group, with black points denoting mean values and error bars representing confidence intervals. Blue colour represents individuals without the deletion (Absent), whereas the red colour represents those with the deletion (Present).*

***
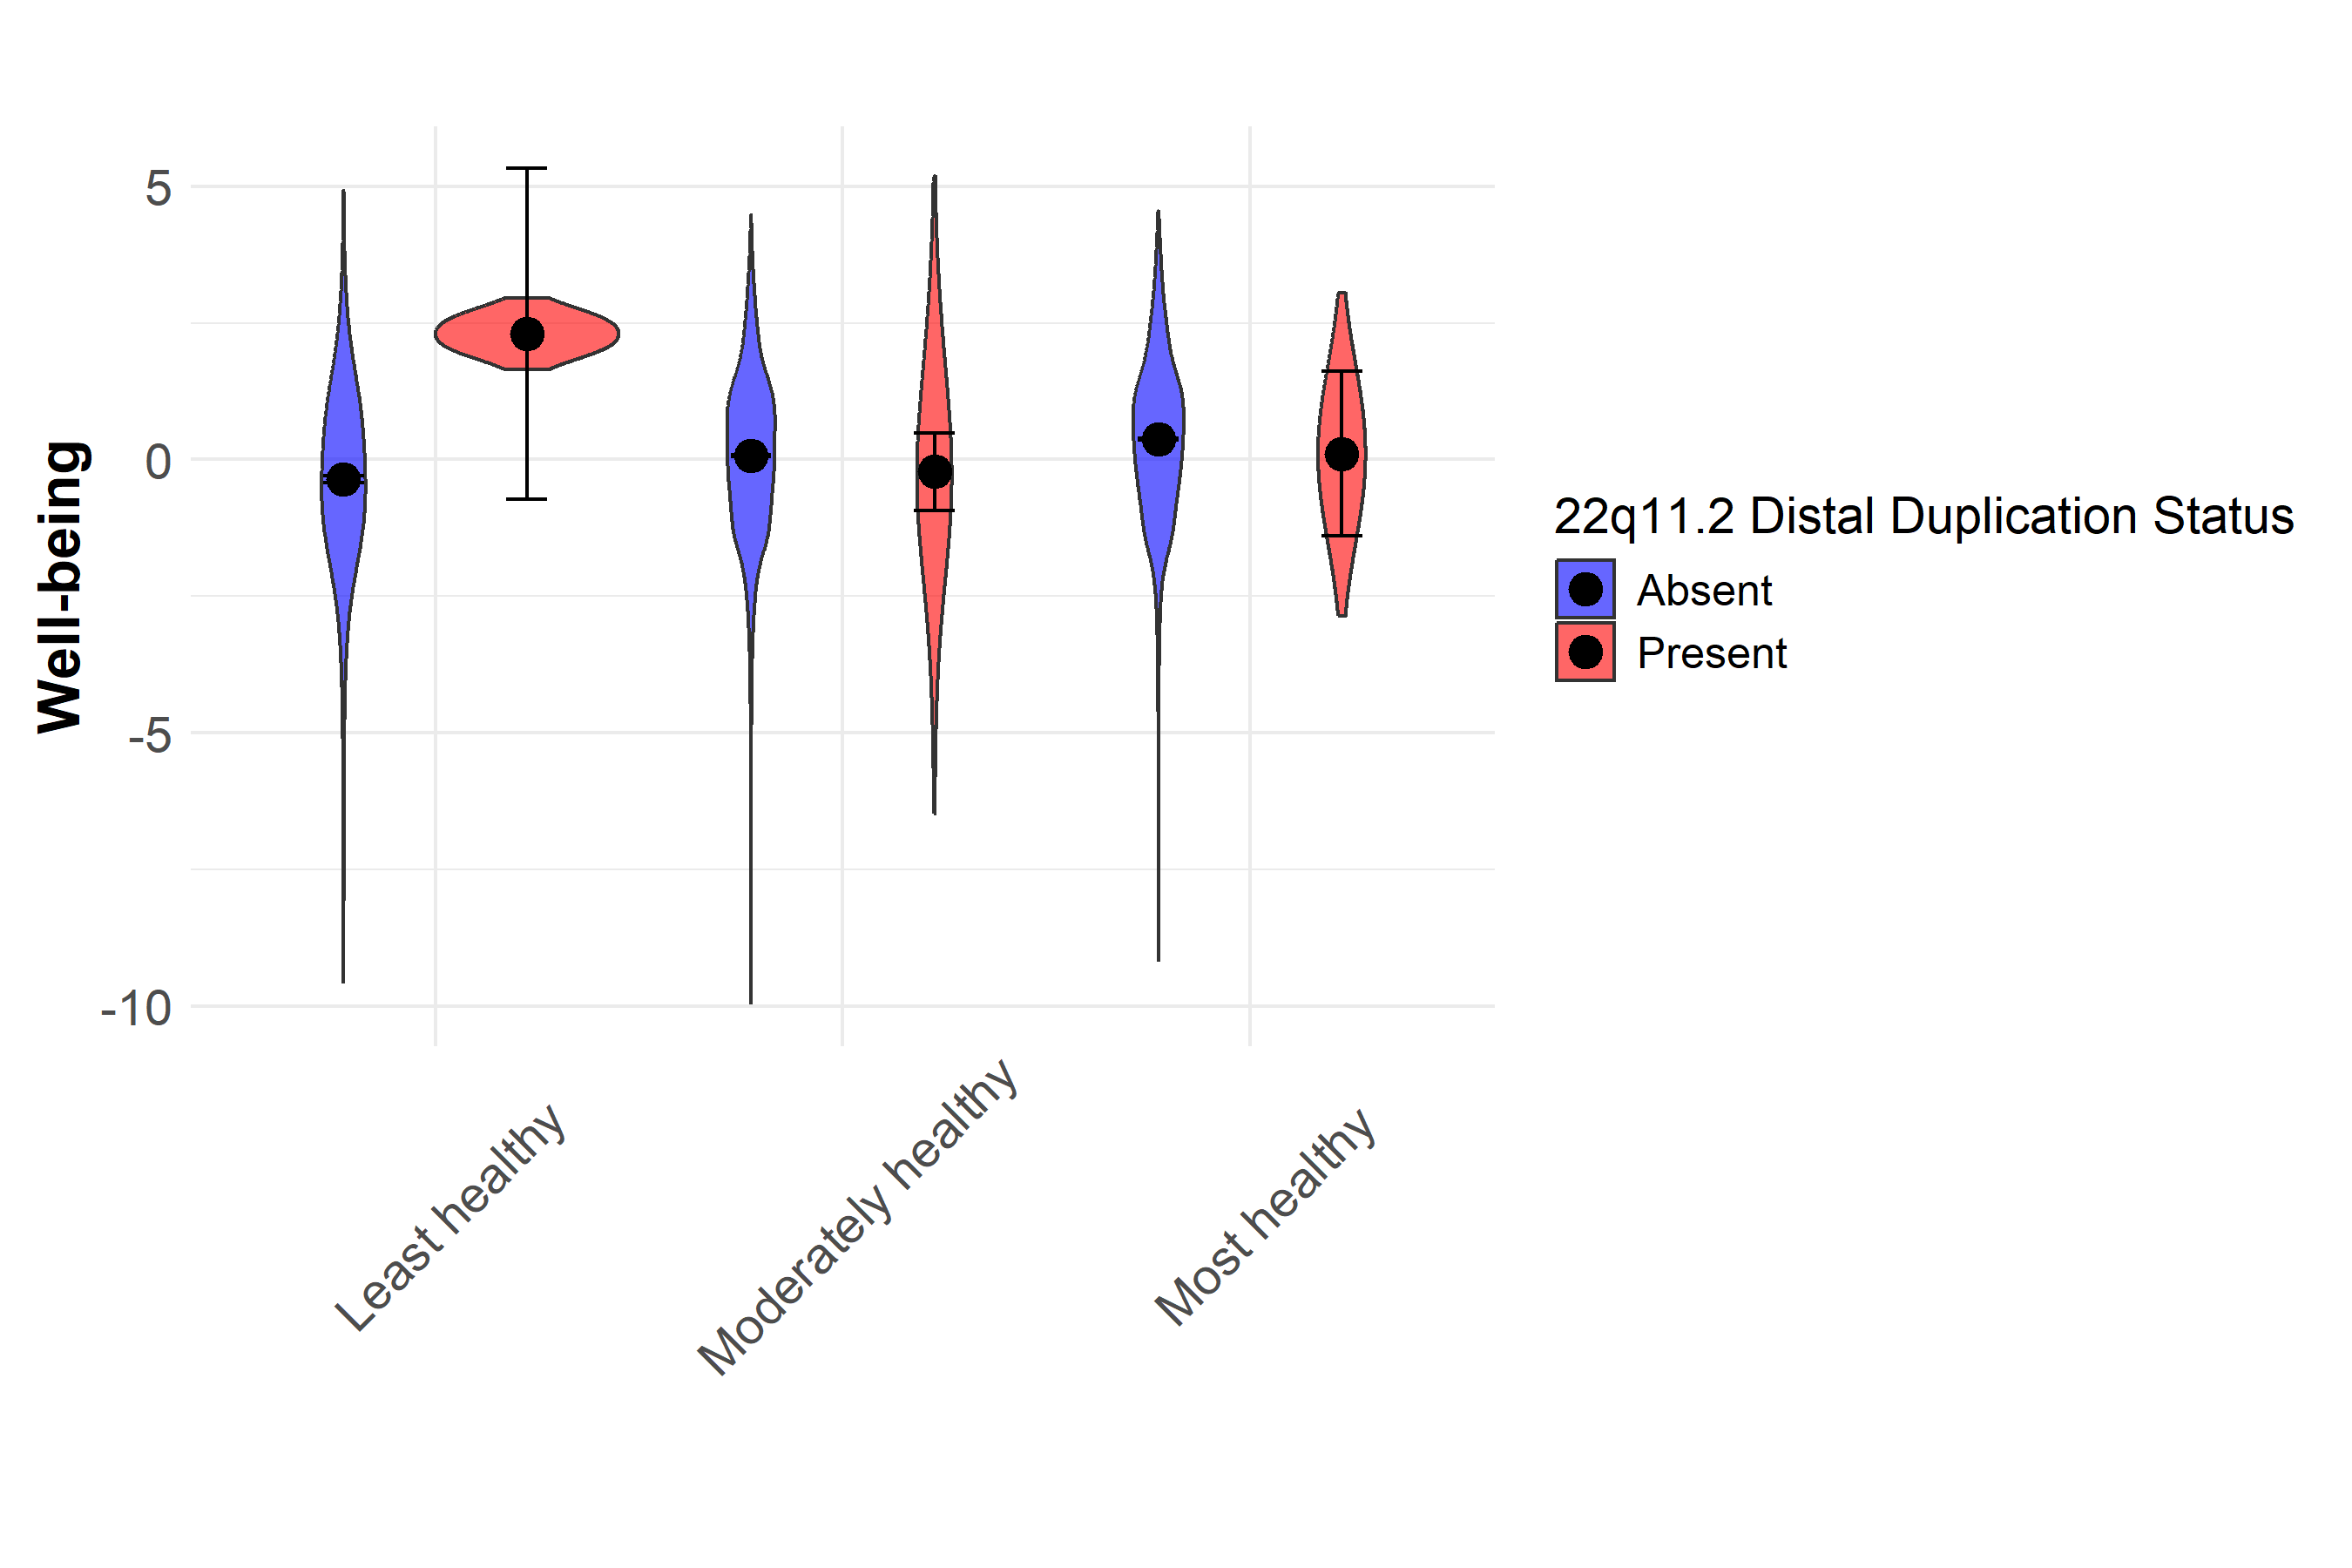
Supplementary Figure 2. Interaction plot for the effect of the 22q11.2 distal duplication and lifestyle on well-being.*** *The x-axis represents the lifestyle, while the y-axis shows mean well-being. Violin plots show the data distribution for each group, with black points denoting mean values and error bars representing confidence intervals. Blue colour represents individuals without the duplication (Absent), whereas the red colour represents those with the duplication (Present).*
